# Supplementary material
Source: MDPI journal article supplement (https://www.mdpi.com/2073-4433/13/11/1938)
Supplement: s1 [file s1]

# Usage of Needle and Branches in the Applications of Bioindicator, Source Apportionment and Risk Assessment of PAHs

Sevil Caliskan Eleren and Yücel Tasdemir \*

Department of Environmental Engineering, Faculty of Engineering, Bursa Uludag University, Nilüfer, 16059 Bursa, Turkey

\* Correspondence: tasdemir@uludag.edu.tr

**Table S1.** PCA analyses results for PAHs in the ambient air and pine needles.

| PAHs                | Ambient Air  |        | Pine Needle  |        |        |        |        |
|---------------------|--------------|--------|--------------|--------|--------|--------|--------|
|                     | PC 1         | PC 2   | PC 1         | PC 2   | PC 3   | PC 4   | PC 5   |
| Ace                 | 0.864        | 0.474  | −0.418       | −0.439 | 0.728  | −0.103 | 0.080  |
| Fluo                | 0.837        | 0.476  | −0.011       | −0.618 | 0.605  | 0.1    | 0.392  |
| Phe                 | 0.823        | −0.472 | −0.422       | 0.41   | 0.605  | 0.0383 | 0.455  |
| Ant                 | 0.298        | −0.861 | 0.453        | 0.576  | 0.019  | 0.547  | 0.32   |
| Flt                 | 0.662        | −0.744 | 0.214        | −0.504 | −0.754 | −0.142 | 0.236  |
| Pyr                 | 0.548        | −0.829 | 0.561        | 0.551  | −0.123 | 0.297  | 0.375  |
| BaA                 | 0.775        | −0.604 | 0.561        | 0.142  | 0.513  | −0.343 | −0.178 |
| Chr                 | 0.947        | −0.202 | 0.045        | 0.887  | −0.049 | 0.097  | −0.133 |
| BbF                 | 0.959        | 0.191  | 0.199        | 0.624  | 0.0403 | −0.706 | 0.123  |
| BkF                 | 0.956        | 0.042  | 0.805        | 0.264  | 0.182  | −0.423 | 0.155  |
| BaP                 | 0.823        | 0.529  | 0.941        | −0.231 | 0.0187 | −0.083 | −0.028 |
| Indeno              | 0.841        | 0.437  | 0.866        | −0.444 | 0.078  | 0.126  | −0.052 |
| DahA                | 0.661        | 0.596  | 0.797        | −0.515 | 0.161  | 0.176  | 0.022  |
| BghiP               | 0.91         | 0.0268 | −0.272       | −0.285 | −0.494 | −0.324 | 0.607  |
| <b>Variance (%)</b> | <b>91.84</b> |        | <b>90.76</b> |        |        |        |        |

**Table S2.** PCA analyses results for PAHs in the one-year-old and two-year-old branches.

| PAHs                | Pine Branch (1-Year-Old) |        |        |        | Pine Branch (2-Year-Old) |        |        |        |        |
|---------------------|--------------------------|--------|--------|--------|--------------------------|--------|--------|--------|--------|
|                     | PC 1                     | PC 2   | PC 3   | PC 4   | PC 1                     | PC 2   | PC 3   | PC 4   | PC 5   |
| Ace                 | 0.176                    | 0.922  | 0.151  | −0.193 | 0.688                    | −0.425 | 0.403  | 0.25   | 0.267  |
| Fluo                | −0.289                   | 0.74   | 0.068  | 0.009  | 0.408                    | −0.602 | 0.637  | 0.06   | 0.136  |
| Phe                 | 0.857                    | 0.366  | 0.294  | 0.058  | 0.895                    | −0.061 | 0.257  | 0.22   | −0.15  |
| Ant                 | 0.809                    | −0.165 | −0.223 | 0.496  | 0.723                    | 0.173  | −0.549 | 0.137  | 0.27   |
| Flt                 | 0.792                    | 0.263  | 0.449  | −0.257 | 0.91                     | 0.232  | 0.084  | 0.188  | −0.173 |
| Pyr                 | 0.816                    | −0.059 | −0.413 | 0.146  | 0.599                    | 0.061  | −0.468 | −0.16  | 0.544  |
| BaA                 | 0.24                     | 0.193  | −0.886 | −0.131 | −0.034                   | 0.646  | 0.535  | −0.381 | 0.32   |
| Chr                 | 0.827                    | 0.232  | 0.253  | 0.017  | 0.633                    | 0.533  | 0.088  | 0.27   | −0.398 |
| BbF                 | 0.242                    | 0.563  | −0.204 | −0.42  | 0.396                    | 0.772  | −0.327 | −0.217 | 0.12   |
| BkF                 | −0.022                   | 0.27   | −0.894 | −0.275 | −0.052                   | 0.824  | 0.152  | 0.387  | −0.025 |
| BaP                 | −0.008                   | 0.24   | −0.043 | 0.828  | −0.477                   | 0.651  | 0.231  | 0.198  | 0.106  |
| Indeno              | −0.348                   | 0.805  | 0.142  | 0.348  | −0.351                   | −0.238 | 0.025  | 0.63   | 0.4    |
| DahA                | −0.287                   | 0.546  | −0.679 | 0.268  | 0.137                    | 0.312  | 0.746  | −0.367 | 0.159  |
| BghiP               | −0.423                   | 0.519  | 0.495  | 0.029  | −0.517                   | 0.339  | 0.0944 | 0.543  | 0.167  |
| <b>Variance (%)</b> | <b>84.56</b>             |        |        |        | <b>88.19</b>             |        |        |        |        |

**Table S3.** Total BaP equivalent concentrations ( $\Sigma_{14}\text{BaP}_{\text{eq}}$ ) values in this study.

| Months                                                      | Dec-2015 | Jan-2016 | Feb-2016 | Apr-2016 | May-2016 | Jun-2016 | Jul-2016 | Aug-2016 | Sep-2016 | Oct-2016 | Nov-2016 |
|-------------------------------------------------------------|----------|----------|----------|----------|----------|----------|----------|----------|----------|----------|----------|
| $\Sigma_{14}\text{BaP}_{\text{eq}}$<br>(ng/m <sup>3</sup> ) | 0.528    | 0.173    | 0.283    | 0.032    | 0.006    | 0.019    | 0.087    | 0.046    | 0.055    | 0.282    | 0.706    |
